# Supplementary material for: Differential impact of systemic lupus erythematosus and rheumatoid arthritis on health-related quality of life
Source: Springer Nature journal article supplement (doi:10.1007/s11136-017-1534-4), 2017-03-11
Supplement: MOESM3 [file 12135508]

**Names of ethical bodies that approved the study**

- Commission cantonale d’éthique de la recherche sur l’être humain (Protocole 190/11)
- Commission d’éthique suprarégionale pour la recherche Clinique (Projet 76/97)
- Geneva: Comité départemental d’éthique de médecine interne communautaire (Protocole 06-100)
- Lausanne: Commission d’éthique de la recherché Clinique (Protocole 04/07)
- Bern: Kantonale Ethikkommission Bern (KEK-Gesuchs-Nr:45/07)
- Basel: Beschlussmitteilung der Ethikkommission beider Basel (Nr. EK: 262/06)
- St Gallen: Kanton St Gallen, Ethikkommission (Nr. EKSG 10/056)
- Zurich: Kanton Zurich, Beschlussmitteilung der Ethikkommission (Nr.: EK-1374)
